1 **BRG1 promotes transcriptional patterns that are permissive to proliferation in cancer cells**

2

3

4 **Authors:**

5 Katherine A. Giles<sup>1,2,3</sup>, Cathryn M. Gould<sup>1</sup>, Joanna Achinger-Kawecka<sup>1,4</sup>, Scott G. Page<sup>2</sup>, Georgia

6 Kafer<sup>2</sup>, Phuc-Loi Luu<sup>1,4</sup>, Anthony J. Cesare<sup>2</sup>, Susan J. Clark<sup>1,4\*</sup>, Phillipa C. Taberlay<sup>3\*</sup>

7 \*These authors contributed equally

8

9 **Affiliations:**

10 <sup>1</sup>Epigenetics Research Laboratory, Genomics & Epigenetics Theme, Garvan Institute of Medical  
11 Research, Sydney, NSW, 2010, Australia

12 <sup>2</sup>Genome Integrity Unit, Children's Medical Research Institute, University of Sydney, Westmead,  
13 NSW, 2145, Australia

14 <sup>3</sup>Tasmanian School of Medicine, College of Health and Medicine, University of Tasmania, Hobart,  
15 TAS, 7000, Australia

16 <sup>4</sup>St Vincent's Clinical School, UNSW Sydney, Sydney, NSW, 2000, Australia

17

18 **Correspondence:** Phillipa C. Taberlay ([phillippa.taberlay@utas.edu.au](mailto:phillippa.taberlay@utas.edu.au))

19

20

21

22

23

24

25

26

27 **ABSTRACT**

28 **Background:** BRG1 (encoded by *SMARCA4*) is a catalytic component of the SWI/SNF chromatin  
29 remodelling complex, with key roles in modulating DNA accessibility. Dysregulation of BRG1 is  
30 observed, but functionally uncharacterised, in a wide range of malignancies. We have probed the  
31 functions of BRG1 on a background of prostate cancer to investigate how BRG1 controls gene  
32 expression programs and cancer cell behaviour.

33 **Results:** Our investigation of *SMARCA4* revealed that BRG1 is universally overexpressed in 486  
34 tumours from The Cancer Genome Atlas prostate cohort, as well as in a complementary panel of  
35 21 prostate cell lines. Next, we utilised a temporal model of BRG1 depletion to investigate the  
36 molecular effects on global transcription programs. Unexpectedly, depleting BRG1 had no impact  
37 on alternative splicing and conferred only modest effect on global expression. However, of the  
38 transcriptional changes that occurred, most manifested as down-regulated expression. Deeper  
39 examination found the common thread linking down-regulated genes was involvement in  
40 proliferation, including several known to increase prostate cancer proliferation (*KLK2*, *PCAT1* and  
41 *VAV3*). Interestingly, the promoters of genes driving proliferation were bound by BRG1 as well  
42 as the oncogenic transcription factors, AR and FOXA1. We also noted that BRG1 depletion  
43 repressed genes involved in cell cycle progression and DNA replication but intriguingly, these  
44 pathways operated independently of AR and FOXA1. In agreement with transcriptional changes,  
45 depleting BRG1 conferred G1 arrest.

46 **Conclusions:** Our data have revealed that BRG1 has capacity to drive oncogenesis by coordinating  
47 oncogenic pathways dependent on BRG1 for proliferation, cell cycle progression and DNA  
48 replication.

49  
50 **Keywords:** BRG1, *SMARCA4*, chromatin remodelling, cancer, gene expression, cell cycle,  
51 transcription, DNA replication

52

## 53 BACKGROUND

54  
55 Nucleosomes serve as a physical backbone for chromatin organization on a global scale and at  
56 local gene regulatory elements. Nucleosomes therefore govern both genome-wide stability and  
57 local DNA accessibility (1). Nucleosome positioning by ATP-dependent chromatin remodellers  
58 plays a critical role in regulating DNA accessibility and allows genes to be expressed at the  
59 appropriate place and time (1). Genomic profiling has demonstrated that dynamic regulation of  
60 DNA accessibility occurs primarily at DNA regulatory elements, which are cell type specific, and  
61 that DNA accessibility changes reflect concomitant transcriptional patterns. (2, 3). It is essential  
62 for chromatin to be relaxed at active gene promoters to create an ordered nucleosome disassembly,  
63 which permits binding of RNA pol II and the general transcription machinery (4, 5). In agreement,  
64 ChIP-seq data show that transcription factors are concentrated on accessible DNA, with the highest  
65 levels of bound transcription factors correlating with the most accessible genomic regions (6).  
66 Conversely, chromatin condensation resulting in reduced DNA accessibility is necessary for  
67 transcriptional repression (7). Disruption to the DNA accessibility landscape is a feature of cancer  
68 (2, 8, 9). This was recently emphasized in genomic sequencing data from multiple cancers and  
69 cancer subtypes, which revealed associations between the accessible chromatin organization and  
70 mutation load (8). Moreover, studies of aged human and yeast cells demonstrated that nucleosome  
71 loss compromises genome stability, gene regulation and transcription (10, 11).

72  
73 Genes encoding ATP-dependent chromatin remodellers are themselves frequently mutated and  
74 often atypically expressed in cancer (5, 12-16). Notably, the SWI/SNF chromatin remodelling  
75 complex is mutated or transcriptionally deregulated in ~20% of cancers; a mutation frequency  
76 approaching that of *TP53* (~26%) (12, 14, 17). The SWI/SNF complex is often described as a  
77 tumour suppressor because it is required by the Retinoblastoma protein (Rb) family for regulation  
78 of normal cell growth (18, 19). Disruptions of multiple SWI/SNF subunits are reported in human

79 tumours and cell lines (13-15, 20-37), often accompanied by a loss of heterozygosity consistent  
80 with the inactivation of a tumour suppressor (13, 34). The specific SWI/SNF mutations observed  
81 in tumours and the cancers associated with altered SWI/SNF function have been extensively  
82 reviewed (12-15, 26, 31, 34, 38). However, the mechanism and functional consequences of  
83 SWI/SNF dysregulation are still being defined.

84  
85 Brahma-related gene 1 (BRG1) is one of the two mutually exclusive ATPases within the SWI/SNF  
86 complex. Interestingly, *SMARCA4*, the gene encoding BRG1, has been observed in both down-  
87 and up- regulated states in cancer, indicative of the diverse and complex BRG1 functions.  
88 *SMARCA4* mRNA was seen to be down regulated in bladder, colon, non-triple negative breast  
89 cancers, head and neck, oesophageal, melanoma, pancreatic, lung and ovarian cancers, and  
90 *SMARCA4* mutation rates in these cancers have been reported between 4-13% (12-14, 22, 24, 30,  
91 39-41). In contrast, *SMARCA4* has been reported as over expressed in cancers of the prostate, triple  
92 negative breast cancers and some leukaemias (12, 22, 24, 30, 42, 43). In *SMARCA4* over  
93 expressing cancers, no significant recurrent mutations have been reported (42, 44-46). The  
94 importance of BRG1 in cancer is further evidenced through studies of synthetic lethality, where  
95 BRG1 was observed to have a synthetic lethal relationship with the alternative SWI/SNF ATPase  
96 Brahm (BRM), and Aurora A kinase in lung cancer, and PTEN in prostate cancer (43, 47, 48).

97  
98 Examination of multiple prostate cancer cohorts has demonstrated elevated *SMARCA4* expression  
99 or increased BRG1 protein levels. Clinical studies of primary prostate tumours reported an overall  
100 increase in BRG1 protein by immunohistochemistry (42, 44-46). Moreover, increased *SMARCA4*  
101 gene expression has been reported in tumours from The Cancer Genome Atlas (TCGA) prostate  
102 cancer cohort (49, 50). While it is established that BRG1 is commonly up regulated in prostate  
103 cancer, the full range of molecular pathways impacted by dysregulated BRG1 levels and the  
104 contribution of these molecular changes to the atypical phenotype of prostate cancer cells remains

105 unclear.

106

107 BRG1 has known roles in regulating DNA for temporal gene expression at both promoters and  
108 enhancer gene regulatory elements (4, 51-56). Moreover, BRG1 maintains the epigenetic  
109 landscape of a cell at these gene regulatory elements. Specifically, BRG1 has been directly linked  
110 to transcriptional output through its recognition of H3K14ac (57-59). In the absence of H3K14ac,  
111 BRG1 is still present at promoters and histones are disassembled from the chromatin; however,  
112 transcription is reduced (60). At enhancers, BRG1 depletion greatly reduces H3K27ac and subtly  
113 reduces H3K4me1, which is correlated with a decrease in chromatin accessibility (53). BRG1 is  
114 also known to mediate inter-chromosomal looping interactions between specific loci such as the  
115 *MYC* enhancer and promoter, the alpha-globulin genes, the *IgH* locus, and the class II major  
116 histocompatibility complex gene locus (24, 61-64). On a global scale, BRG1 binding has been  
117 found at DNA-loop anchors (56) and topological associated domain (TAD) boundaries where it  
118 increases their stability (65). Together, this demonstrates an important role for BRG1 in  
119 maintaining chromatin architecture at both local and global levels for transcription regulation.

120

121 Here we dissected the molecular role of BRG1 on the transcriptome in prostate cancer. We  
122 confirmed that *SMARCA4* is over-expressed in prostate cancer irrespective of severity or cancer  
123 subtype and identified *SMARCA4* was also over expressed in a panel of prostate cancer cell lines.  
124 Depletion of BRG1 in LNCaP prostate cancer cells resulted in a modest effect on global gene  
125 transcription with most changes resulting in down-regulated gene expression. Within the cohort  
126 of down-regulated genes in BRG1 depleted cells we identified gene clusters defined by their co-  
127 occupancy or independence from transcription factors AR and FOXA1, both of which are known  
128 BRG1 co-activators (66-68). Our data revealed that BRG1, AR and FOXA1 co-regulate known  
129 prostate cancer genes *KLK2*, *PCAT1* and *VAV3*. Gene ontology analysis further revealed that genes  
130 regulated by BRG1 independent of AR and FOXA1 include factors regulating cell cycle and

131 proliferation processes including DNA replication. In agreement, depleting BRG1 promoted G1  
132 arrest resulting in reduced cell proliferation. Cumulatively the data indicate BRG1 promotes  
133 expression of cellular proliferation factors and cancer-associated genes in prostate cancer cells.

134

## 135 **RESULTS**

136

### 137 ***SMARCA4* is over expressed in prostate cancer irrespective of tumour grade or subtype**

138 We first examined the expression of *SMARCA4* in the TCGA (50) prostate normal and cancer  
139 cohort. The 486 tumour samples were subset into the seven TCGA categorised molecular subtypes  
140 of prostate cancer (50). These included those with fusion genes involving *ERG* (46%), *ETV1* (8%),  
141 *ETV4* (4%) and *FLII* (1%), or those with mutations in *SPOP* (11%), *FOXAI* (3%) or *IDHI* (1%)  
142 (50). The remaining samples were grouped as ‘other’ (26%). Each subtype exhibited a statistically  
143 significant increase in *SMARCA4* expression ( $p < 0.05$ ) with the exception of the ‘FLII’ subtype  
144 ( $p = 0.5899$ ) and ‘other’ ( $p = 0.1899$ ), which both demonstrated a non-significant increase in  
145 *SMARCA4* expression (Figure 1A). Previous work examining *SMARCA4* expression in the TCGA  
146 prostate cancer cohort demonstrated that it is also up-regulated irrespective of Gleason score (49).  
147 Therefore, we conclude that at the mRNA level, *SMARCA4* is universally over-expressed in  
148 prostate cancer, regardless of clinical grade or molecular subtype.

149

### 150 ***SMARCA4* is over expressed in prostate cancer and transformed prostate cell lines**

151 We next examined both BRG1 protein and *SMARCA4* gene expression levels in normal prostate  
152 epithelial cells (PrEC) and compared to LNCaP (lymph node metastasis), an androgen-dependent  
153 prostate cancer cell line, as well as PC3 (bone metastasis), an androgen-independent prostate  
154 cancer cell line. We found that *SMARCA4* gene expression was increased ~9 fold in LNCaP cells  
155 and ~6 fold in PC3 compared to PrEC ( $p < 0.001$ ; Figure 1B). Further, the BRG1 protein level was  
156 increased ~20 and ~24 fold, respectively, in each of the prostate cancer cell lines compared to

157 PrEC (Figure 1C). We compared this to published RNA-seq data of several normal, cancer and  
158 transformed prostate cell lines (69). The mean expression of *SMARCA4* was significantly  
159 increased in both the cancer cell lines and the transformed cell lines compared to the normal cells  
160 ( $p=0.0148$  and  $p=0.0353$  respectively; Figure 1D). The exception was DU145 cells that has a  
161 known frameshift mutation in *SMARCA4*, resulting in reduced expression (36). This data show  
162 that common prostate cancer cell lines reflect the same pattern of increased BRG1 protein that is  
163 observed in prostate tumours compared to normal prostate samples and therefore provides an  
164 appropriate model system to explore the functional consequences of BRG1 dysregulation on the  
165 transcriptome.

166

### 167 **BRG1 is required for the maintenance of active gene expression**

168 Our previous work has shown that BRG1 occupancy is enriched at active promoter and enhancer  
169 gene regulatory elements in LNCaP cells (56). We therefore hypothesised that BRG1 would play  
170 an important role in maintaining the transcriptional profile of these cells. To assess this, we  
171 depleted the level of BRG1 protein using two independent siRNAs targeting *SMARCA4* (si-  
172 *SMARCA4*-1 and si-*SMARCA4*-2) and performed RNA-seq at 72 and 144 hours post transfection  
173 (Figure 2A). Initial assessment of our RNA-seq data confirmed successful depletion of the  
174 *SMARCA4* transcript (~80%) at both time points (Figure 2B). Additionally, we confirmed  
175 substantial depletion of BRG1 levels reduced to ~40% of the non-targeting control at 72 hours,  
176 and to ~20% of the non-targeting control at 144 hours post-transfection (Figure 2C). We note there  
177 were no significant changes detected in the gene expression of any other SWI/SNF subunit proteins  
178 (Supplementary Figure 1A). Further quality assessment of the RNA-seq data through a principal  
179 component analysis demonstrated that the samples separated by time-point on the first dimension,  
180 accounting for 43.39 % of the sample variance (Supplementary Figure 1B). We performed a  
181 differential gene expression analysis and identified 169 down-regulated genes and 24 up-regulated  
182 genes ( $\log_{2}FC > 1.5$ ,  $FDR < 0.05$ ) at 72 hours post BRG1 depletion (Figure 2D). This increased to

183 800 down-regulated genes and 174 up-regulated genes by 144 hours post-transfection (Figure 2E).  
184 This suggests that the primary role of BRG1 in LNCaP cells is to maintain active gene expression  
185 of a subset of genes.

186

### 187 **BRG1 does not function in the regulation of alternative splicing**

188 The nucleosome barrier within genes is reported to contribute to alternative splicing, where there  
189 is a higher conservation of nucleosomes at the splice sites of constitutive exons compared to  
190 skipped exons (70-72). Since the contribution of BRG1 to alternative splicing regulation is  
191 unknown, we investigated if alterations in alternative splicing may explain down regulation of  
192 gene expression after BRG1 depletion in LNCaP cells. To do this we performed a multivariate  
193 analysis of transcript splicing (MATS; (73-75)) of our RNA-seq datasets. After 72 hours of BRG1  
194 depletion, MATS pairwise comparison detected a genome wide total of 13 and 11 skipped exons,  
195 and 14 and 9 retained introns with si-*SMARCA4-1* and si-*SMARCA4-2* respectively  
196 (Supplementary Figure 1C). At 144 hours post BRG1 knockdown this increased to 240 and 260  
197 skipped exons, and 27 and 26 retained introns with si-*SMARCA4-1* and si-*SMARCA4-2*,  
198 respectively (Supplementary Figure 1D). Given the relatively large number of intron-exon  
199 junctions within the total LNCaP transcriptome, we conclude BRG1 does not extensively  
200 contribute to alternative splicing as the mechanism for predominant gene down-regulation.  
201 However, we do note that at 144 hours post-knockdown the MATS analysis identified retention  
202 of the first intron from the Kallikrein 3 gene, which encodes prostate specific antigen (PSA)  
203 (Supplementary Figure 1E). This splice variant has previously been reported in LNCaP cells and  
204 generates a unique protein from canonical PSA (76). While PSA has a well-known link to prostate  
205 cancer, the function of its alternative splice variant remains unknown.

206

### 207 **BRG1 binding is associated with expression of prostate cancer associated genes**

208 We further examined our RNA-seq datasets to determine which genes showed a significant change



209 in expression at 72 hours that was maintained at 144 hours. Of the genes that were down-regulated  
210 at the 72 hour time point, 126 genes (75 %) remained down-regulated at 144 hours. Similarly, of  
211 the up-regulated genes, 16 (67 %) remained up-regulated at the extended time point (Figure 3A).  
212 Within the down-regulated gene set we note a number of genes that have previously been  
213 associated with increased proliferation in prostate cancer; these include kallikrein 2 (*KLK2*), long  
214 non-coding RNA prostate cancer associated transcript 1 (*PCATI*), Vav guanine nucleotide  
215 exchange factor 3 (*VAV3*) (69, 77-84) (Figure 3B-D). We also examined the panel of prostate cell  
216 lines (69) and confirmed that, on average there is elevated expression of these genes in both  
217 prostate cancer cells and transformed prostate cell lines compared to normal prostate cells  
218 (Supplementary Figure 2A). This suggests a role for BRG1 in maintaining the expression of genes  
219 associated with prostate cancer proliferation.

220  
221 We next sought to further explore commonalities in the genes with a significant change in  
222 expression at both time points. We used ‘Enrichr’ (85, 86) to determine which existing ChIP-seq  
223 datasets of transcription factors had enriched binding at the promoters of these genes. We  
224 discovered that the most significantly enriched datasets were for the androgen receptor (AR) and  
225 Forkhead box A1 (FOXA1) (Figure 3E), both of which are important for prostate cancer growth  
226 (66, 67, 87-91). To investigate the potential coordinated function of these transcription factors with  
227 BRG1, we compare the ChIP-seq signal of BRG1 (91), AR (87) and FOXA1 (87) at BRG1  
228 genome-wide binding sites in LNCaP cells. We found the profiles separated into three clusters.  
229 Cluster 1 sites displayed strong AR and FOXA1 binding, cluster 2 had moderate AR and strong  
230 FOXA1, and cluster 3 had minimal to no signal for AR or FOXA1 (Figure 3F). We next examined  
231 the key BRG1 regulated genes *KLK2*, *PCATI* and *VAV3*, and found coordinated binding of all  
232 three factors at the promoters of *KLK2* and *PCATI*, and binding of BRG1 and FOXA1 upstream  
233 of the internal 3-prime promoter of *VAV3* (Figure 3G). Furthermore, we showed that the expression  
234 of AR or FOXA1 themselves was not regulated by BRG1 (Supplementary Figure 2B-C),

235 suggesting that the loss of BRG1 is enough to disrupt expression and regulation of *KLK2*, *PCAT1*  
236 and *VAV3*.

237

### 238 **BRG1 binding is associated with the expression of DNA replication genes**

239 As the majority of significant gene changes occurred at 144 hours post-knockdown, we next  
240 investigated potential gene regulatory networks. Gene ontology analysis with Enrichr (85, 86)  
241 identified several significant (FDR < 0.05) GO terms pertaining to biological processes, cellular  
242 component and molecular function that were all broadly related to the cell cycle (Figure 4A). As  
243 BRG1 has previously been shown to interact with cell cycle master regulators, such as Rb and p53  
244 (19, 92-94), we explored the relationship between the cell cycle and BRG1 further in our datasets.  
245 We compiled a list of 250 genes related to cell cycle processes, curated from the cell cycle GO  
246 terms, and of these examined the top 40 most significantly down-regulated genes in our dataset.  
247 Of note among the list were several key genes involved in DNA replication initiation such as  
248 *CDC6*, *CDT1* and *CDC45*, as well as the Minichromosome Maintenance (MCM) replicative  
249 helicase components *MCM2* and *MCM5* (Figure 4B). To investigate if the effect on replication  
250 initiation gene expression was more widespread, we reviewed the gene expression of the other  
251 components in the MCM2-7 replicative helicase and the Origin Recognition Complex (ORC) and  
252 found that several of these genes were also down-regulated (Figure 4C-D). We confirmed the  
253 down regulation of *MCM5*, *CDC6* and *ORC6* via Western blot, along with cell cycle regulator  
254 *CHK1*, which revealed almost undetectable expression by 144 hours post BRG1 knockdown  
255 (Figure 4E-F).

256

257 We investigated whether AR and FOXA1 were also colocalised with BRG1 at DNA replication  
258 genes. We examined the ChIP-seq binding profiles of AR, FOXA1 and BRG1 at the promoters of  
259 91 DNA replication genes (determined from the DNA replication GO terms) that were expressed  
260 in LNCaP cells. We found at promoters of these genes containing the active histone marks

261 H3K4me3 and H3K27ac, also displayed a weak BRG1 ChIP-seq signal, but were completely  
262 absent of AR and FOXA1 ChIP-seq peaks (Supplementary Figure 3A), for example at the  
263 promoters of *CDC45*, *ORC6* (Supplementary Figure 3B). Additionally, we also note this pattern  
264 at a putative enhancer region within the *MCM2* gene (Supplementary Figure 3B). Our data  
265 suggests that BRG1 binding is associated with the expression of DNA replication genes in prostate  
266 cancer cells that is independent of AR and FOXA1.

267

### 268 **BRG1 depletion arrests cells in G1**

269 Given BRG1 regulates several genes involved in proliferation and replication, we next asked if  
270 BRG1 depletion would alter cell cycle progression in LNCaP cells. We investigated this utilising  
271 the same siRNA-mediated approach to target BRG1 by depleting *SMARCA4* and conducted flow  
272 cytometry cell cycle analysis at 72 and 144 hours post knockdown. We detected an increase of  
273 cells in G1 at 72 hours, which was enhanced by 144 hours. Specifically, at 144 hours post BRG1  
274 depletion there was ~20% increase of cells in G1 and equivalent loss of cells in S phase (Figure  
275 4G-H). These data suggest that a loss of BRG1 reduces proliferation through mediating a G1 arrest.

276

### 277 **DISCUSSION**

278

279 Here we examined the involvement of the SWI/SNF chromatin remodeller BRG1 and its  
280 associated encoding gene *SMARCA4* in prostate cancer transcriptional deregulation. We found that  
281 over expression of *SMARCA4* commonly occurs in both the TCGA prostate cancer cohort,  
282 irrespective of tumour subtype, and in a panel of prostate cancer cell lines. We also found that  
283 knockdown of the *SMARCA4* gene, and consequently the BRG1 protein, results in down-  
284 regulation of pro-proliferative transcriptional pathways. These included genes already known to  
285 promote prostate cancer proliferation, as well as cell cycle and DNA replication genes. Reduction  
286 of gene expression in these pathways was concomitant with G1 arrest. Taken together, our results

287 provide new insights into BRG1's contribution to transcriptional patterns relating to proliferation  
288 in prostate cancer.

289  
290 We have demonstrated that *SMARCA4* mRNA over expression is a universal feature of prostate  
291 cancer. Clinical datasets have shown BRG1 protein levels are over-expressed in prostate cancer,  
292 in the absence of consistent significant deleterious genetic mutations evident in *SMARCA4* (42,  
293 44-46). Using the large prostate cancer cohort from TCGA (50) we found that *SMARCA4* was  
294 significantly over-expressed. Consistent with this, *SMARCA4* expression was increased in a panel  
295 of both prostate cancer and transformed cell lines. These data emphasise that the overall increased  
296 expression of *SMARCA4* is a characteristic of prostate cancer, irrespective of subtype.

297  
298 BRG1 depletion followed by RNA-seq revealed multiple transcriptomic alterations that were  
299 regulated by BRG1 and related to proliferation. BRG1 depletion primarily resulted in the down-  
300 regulation of BRG1's target genes, indicating the main role of BRG1 is to promote active gene  
301 expression. Within the down-regulated genes were genes associated with increased proliferation  
302 in prostate cancer including *KLK2*, *PCAT-1* and *VAV3*. *KLK2* is a known activator of PSA, which  
303 is an important biomarker of prostate cancer, and associated with decreased apoptosis (77, 84).  
304 *PCAT-1* promotes proliferation through the oncoprotein Myc (69, 81), while *VAV3* regulates AR  
305 activity to stimulate growth in prostate cancer (78-80, 82). Both *PCAT-1* and *VAV3* are correlated  
306 with disease progression. Through an analysis of gene ontologies, we also found several cell cycle  
307 gene pathways were downregulated with BRG1 depletion. This included numerous genes involved  
308 in DNA replication, which were among the most significantly down regulated genes following  
309 BRG1 depletion. BRG1 is known to have a role in driving self-renewal and malignancy in B-cell  
310 acute lymphoblastic and acute myeloid leukaemias, cancers which also have over expressed BRG1  
311 (22, 24). Specifically, these leukaemias require high levels of BRG1 for de-condensation of the  
312 cell specific *MYC* enhancer. In these cancers, a loss of BRG1 causes a reduction of enhancer-

313 promoter interactions, reduced transcription factor occupancy and DNA looping which in turn  
314 reduces *MYC* expression (24). This implies that the overexpression of BRG1 contributes to driving  
315 oncogenic transcriptional programs which influence the proliferation capacity of cancer cells.

316  
317 Our data revealed that BRG1 co-occupied the promoters of proliferation associated genes (*KLK2*,  
318 *PCAT-1* and *VAV3*) along with AR and FOXA1, and that these genes were down-regulated across  
319 our experimental time course. Co-regulation of transcription by AR and FOXA1 in prostate cancer  
320 is associated with reprogrammed binding of AR and oncogenic patterns of gene expression that  
321 are essential for AR-driven proliferation (95, 96). Additionally, there is a high overlap of these  
322 reprogrammed AR binding sites between LNCaP cells and primary prostate tumour tissue (96).  
323 Here we have shown BRG1 gene regulation overlaps with these transcription factors at gene  
324 promoters, which is concomitant with expression of prostate cancer associated genes. However, it  
325 is noteworthy that BRG1 depletion also altered the expression of DNA replication genes through  
326 a mechanism that appears independent of AR and FOXA1. This data suggests that BRG1 has  
327 additional roles in other gene regulatory networks, which may indirectly influence cell  
328 proliferation. As BRG1 is known to interact with cell cycle regulators in other cancers, it is  
329 possible that genes co-regulated by BRG1, AR and FOXA1 are important in a prostate cancer  
330 context, while regulation of cell cycle and DNA replication genes may be a general feature of  
331 BRG1 over expression in cancer.

332

### 333 **CONCLUSIONS**

334

335 In summary, our data identifies fundamental role for BRG1 in maintaining active transcription for  
336 proliferation of prostate cancer cells. We find that BRG1 promotes gene expression in prostate  
337 cancer models with varying degrees of dependence on AR and FOXA1. BRG1 is required to drive  
338 the expression of numerous prostate cancer specific genes in an AR/FOXA1 dependant manner,

339 but also works independently to drive the expression of pro-proliferative and DNA replication  
340 genes. These results provide important functional information regarding the role of BRG1  
341 controlling proliferation in prostate cancer cells.

342

## 343 **METHODS**

344

### 345 *Cell Culture and siRNA Transfection*

346 Normal Prostate Epithelial Cells (PrEC) cells (Cambrex Bio Science, #CC-2555) were cultured in  
347 PrEBM (Clonetics, #CC-3165) according to the manufacturer's protocol. Briefly, PrEC cells were  
348 seeded at 2,500 cells per cm<sup>2</sup> and medium was replaced every two days. Cells were passaged at  
349 approximately 80 % confluence. To passage a T75 flask, PrEC cells were rinsed in 6 mls Hanks  
350 Balanced Salt Solution (Thermo Fisher Scientific, #14025076) then detached with 2 ml pre-  
351 warmed 0.025 % Trypsin-EDTA and incubated at room temperature for 5 minutes. Trypsin was  
352 inactivated with 12 mls of Trypsin-Neutralizing Solution (Clonetics, #CC-5002) and cells were  
353 centrifuged at 300 x g for 5 minutes. The supernatant was aspirated, and the cell pellet was re-  
354 suspended in PrEBM. The number of cells was determined on the Countess automated counter  
355 and were re-seeded at the appropriate density based on experimental needs. Cells were discarded  
356 after ~16 population doublings.

357

358 PC3 cells (ATCC, #CRL-1435) were maintained in RPMI medium (Gibco, #11875-093) with 10  
359 % FBS, 11 mls of 1 M HEPES (Gibco, #15630080) and Pen/Strep. LNCaP cells (ATCC, #CRL-  
360 1740) were cultured using custom T-Medium from Gibco (DMEM low glucose (GIBCO cat#  
361 31600-034), Kaighn's modified F-12 medium (F-12K; cat# 211227-014), insulin 500x bovine  
362 pancreas (Sigma cat# I1882.10MG), T3 6.825 ng/ml Tri-iodothyronine (Sigma cat# T5516),  
363 Transferrin 500x (Sigma cat# T5391), Biotin 500x (Sigma cat# B4639), Adenine 500x (Sigma  
364 cat# A3259)). Both prostate cell lines were cultured under recommend conditions; 37°C with 5 %

365 CO<sub>2</sub>. When the cells reached ~80 % confluence they were passaged or seeded as per experimental  
366 requirements. For siRNA transfection LNCaP cells were seeded into 6-well plates at a density of  
367  $2.5 \times 10^5$  cells per well or 10cm dishes at  $1.5 \times 10^6$  cells per dish. The cells were transfected with  
368 either on target *SMARCA4* siRNA (Horizon, #J-010431-06-0005 or #J-010431-07-0005) or the  
369 non-targeting control siRNA pool (Horizon, #D-001810-10-05) 24 hours after seeding the cells  
370 using DharmaFECT 2 (Thermo Scientific, #T-2002-03) as per the manufacturer's instructions. To  
371 maintain the knockdown over a 6-day period, at 72 hours post transfection the cells were harvested,  
372 split at a ratio of 1:2 into two new wells, and reverse-transfected with siRNA. The cells were then  
373 incubated for a further 72 hours before collection.

374

#### 375 ***Quantitative Real-Time PCR (qRT-PCR)***

376 RNA was extracted with TRIzol reagent (Thermo Scientific, #15596026), according to the  
377 manufacturer's protocol. Extracted RNA was re-suspended in 30 ul of nuclease-free water and  
378 quantified on the NanoDrop spectrophotometer (Thermo Scientific). cDNA synthesis was carried  
379 out with 500 ng of RNA using the SensiFAST cDNA Synthesis Kit (Bioline, #BIO-65054)  
380 according to the manufacturer's instructions.

381

382 qRT-PCR was carried out on the CFX384 Touch Real-Time PCR Detection System (Bio-Rad). A  
383 master mix was made for each qRT-PCR target containing 5 ul of KAPA Universal SYBR Fast  
384 PCR mix (KAPA Biosystems, #KK4602), 0.6ul of 5 uM forward primer, 0.6 ul of 5 uM reverse  
385 primer and 1.8 ul of nuclease free water per reaction. Reactions conditions were 95°C for 3  
386 minutes, followed by 45x cycles of 95 °C for 3 seconds and 60 °C for 30 seconds, then a melt  
387 curve analysis (65 °C to 95 °C, increasing at a rate of 0.5 °C every 5secs). Primers to detect  
388 *SMARCA4* were CAGAACGCACAGACCTTCAA (forward) and  
389 TCACTCTCCTCGCCTTCACT (reverse) and for detection of *I8S*  
390 GGGACTTAATCAACGCAAGC (forward) and GCAATTATTCCCATGAACG (reverse).

391 Relative gene expression was calculated using ddCt and normalised to *I8S*. A significant change  
392 in gene expression of *SMARCA4* between PrEC, LNCaP and PC3 cells was determined by one-  
393 way ANOVA and corrected with Tukey's test for multiple comparisons.

394

### 395 ***Western Blot***

396 Whole cell lysates were collected with lysis buffer (50 mM HEPES, 150 mM NaCl, 10% Glycerol,  
397 1 % Triton-X-100, 1.5 mM MgCl<sub>2</sub>, 1 mM EGTA, 10 mM Pyrophosphate, 100 mM NaF, Roche  
398 protease inhibitor cocktail 1x), and protein level quantified using the Pierce BCA Assay Kit  
399 (Thermo Scientific, #23227) according to the manufacturer's instructions. Sample reducing agent  
400 (Thermo Scientific, NP0004), loading buffer (Thermo Scientific, NP0007) and 10 ug protein were  
401 combined with water to a final volume of 25 ul. Protein samples were heated at 90 °C for 5 minutes  
402 then allowed to cool to room temperature. Protein samples were loaded on a NuPage Novex Bis-  
403 Tris 4-12 % gel (Thermo Scientific, NP0321BOX) and electrophoresed at 100V for 1.5 hours in a  
404 1x MOPS buffer (50 mM MOPS (Biochemicals Astral Scientific, #BIOMB03600, 50 mM  
405 Tris base, 0.1% SDS, 1 mM EDTA [pH 7.7]). Proteins were transferred to a polyvinylidene  
406 fluoride membrane (Bio-Rad, #1620177) at 30 volts for 1 hour using 1x transfer buffer (25 mM  
407 Tris base, 192 mM Glycine [pH 8.3]) with 10 % methanol (Sigma-Aldrich, #322415). Membranes  
408 were blocked for 1 hour with 5 % skim milk in TBS-T (20 mM Tris, 150 mM NaCl, 0.1% Tween  
409 20 [pH 7.6]) at 4°C. Primary antibodies used were BRG1 (Santa Cruz, sc-10768X), GAPDH  
410 (Ambion, AM4300), CHK1 (CST, 2360S), ORC6 (CST, 4737S), CDC6 (CST, 3387S) and MCM5  
411 (abcam, ab17967). Primary antibodies were incubated on samples overnight at 4 °C with rotation.  
412 The membrane was then washed three times for 10mins each in TBS-T with rotation. Secondary  
413 antibodies goat anti-mouse (Santa Cruz, sc-2005) and goat anti-rabbit (Santa Cruz, sc-2004) were  
414 diluted in TBS-T containing 5 % skim milk and incubated at 4 °C with rotation for 1 hour. The  
415 membrane was washed three times for 10 minutes in TBS-T. The membrane was then covered  
416 with ECL solution (Perkin Elmer, #NEL104001EA), incubated for 1min at room temperature, and



417 visualized by X-ray film. Adjusted relative density calculations were processed through ImageJ  
418 (97, 98).

419

#### 420 ***Flow cytometric cell cycle analysis***

421 LNCaP cells were seeded at  $1.5 \times 10^6$  cells per 10 cm dish and transfected with siRNA as  
422 described. At 72 and 144 hours post transfection the cells were treated with 10 uM EdU for 30  
423 minutes. Remaining EdU was washed off the cells with PBS before harvesting cells, then  $1 \times 10^6$   
424 cells were fixed in 70 % ethanol and frozen at  $-20^\circ\text{C}$ . Cells were then diluted 1 in 4 with PBS then  
425 pelleted and re-suspended in 1 ml of PBS containing 1 % BSA (Sigma-Aldrich, #A2058). Cells  
426 were again pelleted, re-suspended in 500 ul of click reaction mix (10uM carbocyanine TEG-  
427 azide, 10 mM Sodium L-ascorbate, and 2 mM Copper-II-sulphate diluted in PBS), and incubated  
428 in the dark at room temperature for 30 minutes. Samples were then diluted with 5 mls of PBS  
429 containing 1 % BSA and 0.1 % Tween-20. Cells were again pelleted, washed with PBS and then  
430 resuspended in 500 ul of PBS containing 1% BSA, 0.1 mg/ml of RNase and 1 ug/ml of DAPI.  
431 Samples were analysed on the Canto II (BD Biosciences). Forward and side scatter were used to  
432 select a population of cells free of cell debris and doublets. Cells were analysed using B450 (FTIC  
433 – EdU positive) and B510 (DAPI) lasers. 50,000 single cell events were recorded for each sample.  
434 FlowJo software v10.5, was used to analyse the data. Data was collected in biological duplicate.

435

#### 436 ***RNA-seq Experiments***

437 Total RNA was extracted with TRIzol reagent, quantified on the Qubit and quality assessed with  
438 the Bioanalyzer. An aliquot of 500 ng of total RNA was spiked with external controls ERCC RNA  
439 spike-in Mix (Thermo Scientific, 4456740) and libraries constructed with the TruSeq Stranded  
440 mRNA sample preparation kit (Illumina, 20020594) according to the manufacturer's protocol.  
441 mRNA Libraries were quantified on Qubit and then stored at  $-20^\circ\text{C}$ . Library quality and fragment  
442 size of RNA-seq libraries was assessed on the Bioanalyzer, then KAPA Library Quantification

443 (KAPA Biosystems, #KK4824) was performed according to the manufacturer's protocol. The  
444 KAPA quantification results were used to dilute the libraries to 2 nM for sequencing. RNA-seq  
445 samples were sequenced for 100 cycles of paired-end reads on the Illumina HiSeq 2500 platform,  
446 with four samples multiplexed per lane of the high output run.

447

#### 448 ***RNA-seq Data Analysis***

449 RNA-seq data was processed as described in Taberlay & Achinger-Kawecka *et al.* (9). Briefly,  
450 read counts were normalized with ERCC spike in controls, mapped to hg19/GRCh37 using STAR  
451 and counted into genes using the featureCounts (99) program. GENCODE v19 was used as a  
452 reference transcriptome to determine the transcript per million read (TPM) value. Fold change was  
453 calculated within each time point as the log<sub>2</sub> ratio of normalized reads per gene using the *edgeR*  
454 package in R. Genes with a fold change of  $\pm 1.5$  and FDR < 0.01 were considered significantly  
455 different. Volcano plots of differential expression were created in R with *ggplots2* and heatmaps  
456 with the *heatmap2* package with normalised row Z-score. PCA was performed in R using the  
457 *edgeR* package with log counts per million (logCPMS) over GENCODE v19 annotated gene  
458 coordinates and normalizing the read counts to library size. RNA-seq multivariate analysis of  
459 transcript splicing (MATS) to calculate exon skipping and intron retention was performed with the  
460 MATS python package v4.0.2 (73-75). Transcription factor and GO term enrichment was obtained  
461 from Enrichr (<http://amp.pharm.mssm.edu/Enrichr/>) online gene list analysis tool (85, 86).

462

#### 463 ***TCGA and prostate cell line expression analysis***

464 Pre-processed RNA-seq data from the TCGA prostate adenocarcinoma cohort was downloaded  
465 ([cancergenome.nih.gov](http://cancergenome.nih.gov)) for both normal and tumour samples. The average of tumour (n = 486)  
466 and normal (n = 52) samples was calculated to determine mean expression. Separation of tumours  
467 by Gleason score and molecular subtype was performed in R using the associated clinical data to  
468 subset the appropriate groups. Significance was calculated for tumour versus normal using an

469 unpaired T-test. For comparison between Gleason score or molecular subtype, significance was  
470 calculated using one-way ANOVA with Dunnett's multiple comparison correction.

471  
472 Expression data for prostate cell lines from Presner et al. (69) was downloaded from  
473 [http://www.betastasis.com/prostate\\_cancer/](http://www.betastasis.com/prostate_cancer/). Significance between normal, cancer and  
474 transformed cell lines was calculated using one-way ANOVA with Dunnett's multiple comparison  
475 correction.

476  
477 ***ChIP-seq data***  
478 The following LNCaP ChIP-seq data was obtained from GEO ([ncbi.nlm.nih.gov/geo/](http://ncbi.nlm.nih.gov/geo/)); BRG1  
479 accession GSE72690 (91), H3K4me3 and H3K27me3 accession GSE38685 (100), H3K27ac and  
480 H3K4me1 accession GSE73785 (9). These data were processed through NGSane pipeline as  
481 previously described (9, 100). Pre-processed bigwig files for FOXA1 and AR were obtained from  
482 GEO accession GSE114274 (87). Genome browser images of ChIP-seq data were taken from IGV.  
483 Heatmaps of ChIP-seq signal were created with *deeptools* (101).

484

## 485 **DECLARATIONS**

486

### 487 ***Ethics approval and consent to participate***

488 Not Applicable

489

### 490 ***Consent for publication***

491 Not Applicable

492

### 493 ***Availability of data and materials***

494 The BRG1 knockdown RNA-seq data generated for this study has been submitted to GEO,  
495 accession number GSE150252. Reviewer access for the submitted data is available from;  
496 <https://www.ncbi.nlm.nih.gov/geo/query/acc.cgi?acc=GSE150252>

497

#### 498 *Competing interests*

499 The authors declare that they have no competing interests.

500

#### 501 *Funding*

502 This work is supported by grants awarded to A.J.C, S.J.C and P.C.T. A.J.C. is supported by grants  
503 from the NHMRC (1162886, 1185870), the Goodridge Foundation and the Neil and Norma Hill  
504 Foundation. S.J.C. is supported by grants (1011447, 1070418, 1051757) and a fellowship  
505 (1156408) from the NHMRC. P.C.T. is supported by project grants from the Cure Cancer Australia  
506 Foundation (1060713) and the NHMRC (1051757, 1161985), and a fellowship (1109696) and  
507 investigator grant from the NHMRC (1176417).

508

#### 509 *Authors' contributions*

510 This study was initiated and designed by KAG, SJC and PCT. Experiments were performed by  
511 KAG, SGP and GK. Analysis and interpretation of next-generation data was performed by KAG,  
512 CMG, JAK and PL. Initial manuscript draft was written by KAG. Manuscript editing and  
513 reviewing was conducted by KAG, JAK, SGP, GK, AJC, SJC and PCT. All authors have read and  
514 approval the final version of this manuscript. Funding for this work was provided by AJC, SJC  
515 and PCT.

516

#### 517 *Acknowledgements*

518 We thank Suat Dervish and the Westmead Flow Cytometry facility for the FACS analysis  
519 infrastructure.

520

521 **REFERENCES**

522

- 523 1. Giles KA, Taberlay PC. The Role of Nucleosomes in Epigenetic Gene Regulation.  
524 Clinical Epigenetics. 2019;87-117.
- 525 2. Taberlay PC, Statham AL, Kelly TK, Clark SJ, Jones PA. Reconfiguration of  
526 nucleosome-depleted regions at distal regulatory elements accompanies DNA methylation of  
527 enhancers and insulators in cancer. Genome Res. 2014;24(9):1421-32.
- 528 3. Thurman RE, Rynes E, Humbert R, Vierstra J, Maurano MT, Haugen E, et al. The  
529 accessible chromatin landscape of the human genome. Nature. 2012;489(7414):75-82.
- 530 4. Heintzman ND, Stuart RK, Hon G, Fu Y, Ching CW, Hawkins RD, et al. Distinct and  
531 predictive chromatin signatures of transcriptional promoters and enhancers in the human  
532 genome. Nat Genet. 2007;39(3):311-8.
- 533 5. Skulte KA, Phan L, Clark SJ, Taberlay PC. Chromatin remodeler mutations in human  
534 cancers: epigenetic implications. Epigenomics. 2014;6(4):397-414.
- 535 6. Li XY, Thomas S, Sabo PJ, Eisen MB, Stamatoyannopoulos JA, Biggin MD. The role of  
536 chromatin accessibility in directing the widespread, overlapping patterns of Drosophila  
537 transcription factor binding. Genome Biol. 2011;12(4):R34.
- 538 7. Venkatesh S, Workman JL. Histone exchange, chromatin structure and the regulation of  
539 transcription. Nature reviews Molecular cell biology. 2015;16(3):178-89.
- 540 8. Makova KD, Hardison RC. The effects of chromatin organization on variation in  
541 mutation rates in the genome. Nat Rev Genet. 2015;16(4):213-23.
- 542 9. Taberlay PC, Achinger-Kawecka J, Lun AT, Buske FA, Sabir K, Gould CM, et al. Three-  
543 dimensional disorganization of the cancer genome occurs coincident with long-range genetic and  
544 epigenetic alterations. Genome Res. 2016;26(6):719-31.

- 545 10. Hu Z, Chen K, Xia Z, Chavez M, Pal S, Seol JH, et al. Nucleosome loss leads to global  
546 transcriptional up-regulation and genomic instability during yeast aging. *Genes Dev.*  
547 2014;28(4):396-408.
- 548 11. O'Sullivan RJ, Kubicek S, Schreiber SL, Karlseder J. Reduced histone biosynthesis and  
549 chromatin changes arising from a damage signal at telomeres. *Nat Struct Mol Biol.*  
550 2010;17(10):1218-25.
- 551 12. Giles KA, Taberlay PC. Mutations in Chromatin Remodeling Factors. *Encyclopedia of*  
552 *Cancer (Third Edition).* 2019:511-27.
- 553 13. Reisman D, Glaros S, Thompson EA. The SWI/SNF complex and cancer. *Oncogene.*  
554 2009;28(14):1653-68.
- 555 14. Shain AH, Pollack JR. The spectrum of SWI/SNF mutations, ubiquitous in human  
556 cancers. *PLoS One.* 2013;8(1):e55119.
- 557 15. Wilson BG, Roberts CW. SWI/SNF nucleosome remodellers and cancer. *Nat Rev*  
558 *Cancer.* 2011;11(7):481-92.
- 559 16. Chu X, Guo X, Jiang Y, Yu H, Liu L, Shan W, et al. Genotranscriptomic meta-analysis  
560 of the CHD family chromatin remodelers in human cancers - initial evidence of an oncogenic  
561 role for CHD7. *Mol Oncol.* 2017;11(10):1348-60.
- 562 17. Kadoch C, Hargreaves DC, Hodges C, Elias L, Ho L, Ranish J, et al. Proteomic and  
563 bioinformatic analysis of mammalian SWI/SNF complexes identifies extensive roles in human  
564 malignancy. *Nat Genet.* 2013;45(6):592-601.
- 565 18. Dunaief JL, Strober BE, Guha S, Khavari PA, Alin K, Luban J, et al. The retinoblastoma  
566 protein and BRG1 form a complex and cooperate to induce cell cycle arrest. *Cell.*  
567 1994;79(1):119-30.
- 568 19. Strober BE, Dunaief JL, Guha, Goff SP. Functional interactions between the  
569 hBRM/hBRG1 transcriptional activators and the pRB family of proteins. *Mol Cell Biol.*  
570 1996;16(4):1576-83.

- 571 20. Yokoyama Y, Matsushita Y, Shigeto T, Futagami M, Mizunuma H. Decreased ARID1A  
572 expression is correlated with chemoresistance in epithelial ovarian cancer. *Journal of*  
573 *gynecologic oncology*. 2014;25(1):58-63.
- 574 21. Song S, Walter V, Karaca M, Li Y, Bartlett CS, Smiraglia DJ, et al. Gene Silencing  
575 Associated with SWI/SNF Complex Loss During NSCLC Development. *Molecular cancer*  
576 *research : MCR*. 2014.
- 577 22. Buscarlet M, Krasteva V, Ho L, Simon C, Hebert J, Wilhelm B, et al. Essential role of  
578 BRG, the ATPase subunit of BAF chromatin remodeling complexes, in leukemia maintenance.  
579 *Blood*. 2014.
- 580 23. Yan HB, Wang XF, Zhang Q, Tang ZQ, Jiang YH, Fan HZ, et al. Reduced expression of  
581 the chromatin remodeling gene ARID1A enhances gastric cancer cell migration and invasion via  
582 downregulation of E-cadherin transcription. *Carcinogenesis*. 2013.
- 583 24. Shi J, Whyte WA, Zepeda-Mendoza CJ, Milazzo JP, Shen C, Roe JS, et al. Role of  
584 SWI/SNF in acute leukemia maintenance and enhancer-mediated Myc regulation. *Genes Dev*.  
585 2013;27(24):2648-62.
- 586 25. Romero OA, Torres-Diz M, Pros E, Savola S, Gomez A, Moran S, et al. MAX  
587 inactivation in small-cell lung cancer disrupts the MYC-SWI/SNF programs and is synthetic  
588 lethal with BRG1. *Cancer discovery*. 2013.
- 589 26. Oike T, Ogiwara H, Nakano T, Yokota J, Kohno T. Inactivating mutations in SWI/SNF  
590 chromatin remodeling genes in human cancer. *Jpn J Clin Oncol*. 2013;43(9):849-55.
- 591 27. Mao TL, Ardighieri L, Ayhan A, Kuo KT, Wu CH, Wang TL, et al. Loss of ARID1A  
592 expression correlates with stages of tumor progression in uterine endometrioid carcinoma. *The*  
593 *American journal of surgical pathology*. 2013;37(9):1342-8.
- 594 28. Cho H, Kim JS, Chung H, Perry C, Lee H, Kim JH. Loss of ARID1A/BAF250a  
595 expression is linked to tumor progression and adverse prognosis in cervical cancer. *Human*  
596 *pathology*. 2013;44(7):1365-74.

- 597 29. Bosse T, ter Haar NT, Seeber LM, v Diest PJ, Hes FJ, Vasen HF, et al. Loss of ARID1A  
598 expression and its relationship with PI3K-Akt pathway alterations, TP53 and microsatellite  
599 instability in endometrial cancer. *Modern pathology : an official journal of the United States and*  
600 *Canadian Academy of Pathology, Inc.* 2013;26(11):1525-35.
- 601 30. Bai J, Mei P, Zhang C, Chen F, Li C, Pan Z, et al. BRG1 is a prognostic marker and  
602 potential therapeutic target in human breast cancer. *PLoS One.* 2013;8(3):e59772.
- 603 31. You JS, Jones PA. Cancer genetics and epigenetics: two sides of the same coin? *Cancer*  
604 *cell.* 2012;22(1):9-20.
- 605 32. Katagiri A, Nakayama K, Rahman MT, Rahman M, Katagiri H, Nakayama N, et al. Loss  
606 of ARID1A expression is related to shorter progression-free survival and chemoresistance in  
607 ovarian clear cell carcinoma. *Modern pathology : an official journal of the United States and*  
608 *Canadian Academy of Pathology, Inc.* 2012;25(2):282-8.
- 609 33. Roberts CW, Biegel JA. The role of SMARCB1/INI1 in development of rhabdoid tumor.  
610 *Cancer biology & therapy.* 2009;8(5):412-6.
- 611 34. Roy DM, Walsh LA, Chan TA. Driver mutations of cancer epigenomes. *Protein Cell.*  
612 2014;5(4):265-96.
- 613 35. Zhao J, Liu C, Zhao Z. ARID1A: a potential prognostic factor for breast cancer. *Tumour*  
614 *Biol.* 2014.
- 615 36. Wong AK, Shanahan F, Chen Y, Lian L, Ha P, Hendricks K, et al. BRG1, a component  
616 of the SWI-SNF complex, is mutated in multiple human tumor cell lines. *Cancer Res.*  
617 2000;60(21):6171-7.
- 618 37. Medina PP, Romero OA, Kohno T, Montuenga LM, Pio R, Yokota J, et al. Frequent  
619 BRG1/SMARCA4-inactivating mutations in human lung cancer cell lines. *Hum Mutat.*  
620 2008;29(5):617-22.
- 621 38. Roberts CW, Orkin SH. The SWI/SNF complex--chromatin and cancer. *Nat Rev Cancer.*  
622 2004;4(2):133-42.



- 623 39. Wilson BG, Helming KC, Wang X, Kim Y, Vazquez F, Jagani Z, et al. Residual  
624 complexes containing SMARCA2 (BRM) underlie the oncogenic drive of SMARCA4 (BRG1)  
625 mutation. *Mol Cell Biol*. 2014.
- 626 40. Herpel E, Rieker RJ, Dienemann H, Muley T, Meister M, Hartmann A, et al. SMARCA4  
627 and SMARCA2 deficiency in non-small cell lung cancer: immunohistochemical survey of 316  
628 consecutive specimens. *Ann Diagn Pathol*. 2017;26:47-51.
- 629 41. Agaimy A, Fuchs F, Moskalev EA, Sirbu H, Hartmann A, Haller F. SMARCA4-deficient  
630 pulmonary adenocarcinoma: clinicopathological, immunohistochemical, and molecular  
631 characteristics of a novel aggressive neoplasm with a consistent TTF1(neg)/CK7(pos)/HepPar-  
632 1(pos) immunophenotype. *Virchows Arch*. 2017;471(5):599-609.
- 633 42. Sun A, Tawfik O, Gayed B, Thrasher JB, Hoestje S, Li C, et al. Aberrant expression of  
634 SWI/SNF catalytic subunits BRG1/BRM is associated with tumor development and increased  
635 invasiveness in prostate cancers. *Prostate*. 2007;67(2):203-13.
- 636 43. Ding Y, Li N, Dong B, Guo W, Wei H, Chen Q, et al. Chromatin remodeling ATPase  
637 BRG1 and PTEN are synthetic lethal in prostate cancer. *J Clin Invest*. 2019;129(2):759-73.
- 638 44. Liu XB, Sun AJ, Wang C, Chen LR. [Expression of BRG1 and BRM proteins in prostatic  
639 cancer]. *Zhonghua Bing Li Xue Za Zhi*. 2010;39(9):591-4.
- 640 45. Li Y, Shi QL, Jin XZ, Meng K, Zhou XJ, Sun LP. [BRG1 expression in prostate  
641 carcinoma by application of tissue microarray]. *Zhonghua Nan Ke Xue*. 2006;12(7):629-32.
- 642 46. Valdman A, Nordenskjold A, Fang X, Naito A, Al-Shukri S, Larsson C, et al. Mutation  
643 analysis of the BRG1 gene in prostate cancer clinical samples. *Int J Oncol*. 2003;22(5):1003-7.
- 644 47. Tagal V, Wei S, Zhang W, Brekken RA, Posner BA, Peyton M, et al. SMARCA4-  
645 inactivating mutations increase sensitivity to Aurora kinase A inhibitor VX-680 in non-small cell  
646 lung cancers. *Nat Commun*. 2017;8:14098.

- 647 48. Oike T, Ogiwara H, Tominaga Y, Ito K, Ando O, Tsuta K, et al. A synthetic lethality-  
648 based strategy to treat cancers harboring a genetic deficiency in the chromatin remodeling factor  
649 BRG1. *Cancer Res.* 2013;73(17):5508-18.
- 650 49. Muthuswami R, Bailey L, Rakesh R, Imbalzano AN, Nickerson JA, Hockensmith JW.  
651 BRG1 is a prognostic indicator and a potential therapeutic target for prostate cancer. *J Cell*  
652 *Physiol.* 2019.
- 653 50. Cancer Genome Atlas Research N. The Molecular Taxonomy of Primary Prostate  
654 Cancer. *Cell.* 2015;163(4):1011-25.
- 655 51. Tolstorukov MY, Sansam CG, Lu P, Koellhoffer EC, Helming KC, Alver BH, et al.  
656 Swi/Snf chromatin remodeling/tumor suppressor complex establishes nucleosome occupancy at  
657 target promoters. *Proc Natl Acad Sci U S A.* 2013;110(25):10165-70.
- 658 52. Alver BH, Kim KH, Lu P, Wang X, Manchester HE, Wang W, et al. The SWI/SNF  
659 chromatin remodelling complex is required for maintenance of lineage specific enhancers. *Nat*  
660 *Commun.* 2017;8:14648.
- 661 53. Hodges HC, Stanton BZ, Cermakova K, Chang CY, Miller EL, Kirkland JG, et al.  
662 Dominant-negative SMARCA4 mutants alter the accessibility landscape of tissue-unrestricted  
663 enhancers. *Nat Struct Mol Biol.* 2018;25(1):61-72.
- 664 54. Hu G, Schones DE, Cui K, Ybarra R, Northrup D, Tang Q, et al. Regulation of  
665 nucleosome landscape and transcription factor targeting at tissue-specific enhancers by BRG1.  
666 *Genome Res.* 2011;21(10):1650-8.
- 667 55. Bao X, Rubin AJ, Qu K, Zhang J, Giresi PG, Chang HY, et al. A novel ATAC-seq  
668 approach reveals lineage-specific reinforcement of the open chromatin landscape via cooperation  
669 between BAF and p63. *Genome biology.* 2015;16:284.
- 670 56. Giles KA, Gould CM, Du Q, Skvortsova K, Song JZ, Maddugoda MP, et al. Integrated  
671 epigenomic analysis stratifies chromatin remodellers into distinct functional groups. *Epigenetics*  
672 *Chromatin.* 2019;12(1):12.

- 673 57. Luebben WR, Sharma N, Nyborg JK. Nucleosome eviction and activated transcription  
674 require p300 acetylation of histone H3 lysine 14. *Proc Natl Acad Sci U S A*.  
675 2010;107(45):19254-9.
- 676 58. Morrison EA, Sanchez JC, Ronan JL, Farrell DP, Varzavand K, Johnson JK, et al. DNA  
677 binding drives the association of BRG1/hBRM bromodomains with nucleosomes. *Nat Commun*.  
678 2017;8:16080.
- 679 59. Shen W, Xu C, Huang W, Zhang J, Carlson JE, Tu X, et al. Solution structure of human  
680 Brg1 bromodomain and its specific binding to acetylated histone tails. *Biochemistry*.  
681 2007;46(8):2100-10.
- 682 60. Church M, Smith KC, Alhussain MM, Pennings S, Fleming AB. Sas3 and Ada2(Gcn5)-  
683 dependent histone H3 acetylation is required for transcription elongation at the de-repressed  
684 FLO1 gene. *Nucleic Acids Res*. 2017;45(8):4413-30.
- 685 61. Kim SI, Bresnick EH, Bultman SJ. BRG1 directly regulates nucleosome structure and  
686 chromatin looping of the alpha globin locus to activate transcription. *Nucleic Acids Res*.  
687 2009;37(18):6019-27.
- 688 62. Kim SI, Bultman SJ, Kiefer CM, Dean A, Bresnick EH. BRG1 requirement for long-  
689 range interaction of a locus control region with a downstream promoter. *Proc Natl Acad Sci U S*  
690 *A*. 2009;106(7):2259-64.
- 691 63. Bossen C, Murre CS, Chang AN, Mansson R, Rodewald HR, Murre C. The chromatin  
692 remodeler Brg1 activates enhancer repertoires to establish B cell identity and modulate cell  
693 growth. *Nat Immunol*. 2015;16(7):775-84.
- 694 64. Ni Z, Abou El Hassan M, Xu Z, Yu T, Bremner R. The chromatin-remodeling enzyme  
695 BRG1 coordinates CIITA induction through many interdependent distal enhancers. *Nat*  
696 *Immunol*. 2008;9(7):785-93.

- 697 65. Barutcu AR, Lajoie BR, Fritz AJ, McCord RP, Nickerson JA, van Wijnen AJ, et al.  
698 SMARCA4 regulates gene expression and higher-order chromatin structure in proliferating  
699 mammary epithelial cells. *Genome Res.* 2016;26(9):1188-201.
- 700 66. Dai Y, Ngo D, Jacob J, Forman LW, Faller DV. Prohibitin and the SWI/SNF ATPase  
701 subunit BRG1 are required for effective androgen antagonist-mediated transcriptional repression  
702 of androgen receptor-regulated genes. *Carcinogenesis.* 2008;29(9):1725-33.
- 703 67. Marshall TW, Link KA, Petre-Draviam CE, Knudsen KE. Differential requirement of  
704 SWI/SNF for androgen receptor activity. *J Biol Chem.* 2003;278(33):30605-13.
- 705 68. Hoffman JA, Trotter KW, Ward JM, Archer TK. BRG1 governs glucocorticoid receptor  
706 interactions with chromatin and pioneer factors across the genome. *Elife.* 2018;7.
- 707 69. Prensner JR, Iyer MK, Balbin OA, Dhanasekaran SM, Cao Q, Brenner JC, et al.  
708 Transcriptome sequencing across a prostate cancer cohort identifies PCAT-1, an unannotated  
709 lincRNA implicated in disease progression. *Nat Biotechnol.* 2011;29(8):742-9.
- 710 70. Andersson R, Enroth S, Rada-Iglesias A, Wadelius C, Komorowski J. Nucleosomes are  
711 well positioned in exons and carry characteristic histone modifications. *Genome Res.*  
712 2009;19(10):1732-41.
- 713 71. Dhami P, Saffrey P, Bruce AW, Dillon SC, Chiang K, Bonhoure N, et al. Complex exon-  
714 intron marking by histone modifications is not determined solely by nucleosome distribution.  
715 *PLoS One.* 2010;5(8):e12339.
- 716 72. Huang H, Yu S, Liu H, Sun X. Nucleosome organization in sequences of alternative  
717 events in human genome. *Bio Systems.* 2012;109(2):214-9.
- 718 73. Shen S, Park JW, Huang J, Dittmar KA, Lu ZX, Zhou Q, et al. MATS: a Bayesian  
719 framework for flexible detection of differential alternative splicing from RNA-Seq data. *Nucleic  
720 Acids Res.* 2012;40(8):e61.

- 721 74. Shen S, Park JW, Lu ZX, Lin L, Henry MD, Wu YN, et al. rMATS: robust and flexible  
722 detection of differential alternative splicing from replicate RNA-Seq data. *Proc Natl Acad Sci U*  
723 *S A*. 2014;111(51):E5593-601.
- 724 75. Park JW, Tokheim C, Shen S, Xing Y. Identifying differential alternative splicing events  
725 from RNA sequencing data using RNASeq-MATS. *Methods Mol Biol*. 2013;1038:171-9.
- 726 76. David A, Mabjeesh N, Azar I, Biton S, Engel S, Bernstein J, et al. Unusual alternative  
727 splicing within the human kallikrein genes KLK2 and KLK3 gives rise to novel prostate-specific  
728 proteins. *J Biol Chem*. 2002;277(20):18084-90.
- 729 77. Shang Z, Niu Y, Cai Q, Chen J, Tian J, Yeh S, et al. Human kallikrein 2 (KLK2)  
730 promotes prostate cancer cell growth via function as a modulator to promote the ARA70-  
731 enhanced androgen receptor transactivation. *Tumour Biol*. 2014;35(3):1881-90.
- 732 78. Lin KT, Gong J, Li CF, Jang TH, Chen WL, Chen HJ, et al. Vav3-rac1 signaling  
733 regulates prostate cancer metastasis with elevated Vav3 expression correlating with prostate  
734 cancer progression and posttreatment recurrence. *Cancer Res*. 2012;72(12):3000-9.
- 735 79. Liu Y, Mo JQ, Hu Q, Boivin G, Levin L, Lu S, et al. Targeted overexpression of vav3  
736 oncogene in prostatic epithelium induces nonbacterial prostatitis and prostate cancer. *Cancer*  
737 *Res*. 2008;68(15):6396-406.
- 738 80. Lyons LS, Burnstein KL. Vav3, a Rho GTPase guanine nucleotide exchange factor,  
739 increases during progression to androgen independence in prostate cancer cells and potentiates  
740 androgen receptor transcriptional activity. *Mol Endocrinol*. 2006;20(5):1061-72.
- 741 81. Prensner JR, Chen W, Han S, Iyer MK, Cao Q, Kothari V, et al. The long non-coding  
742 RNA PCAT-1 promotes prostate cancer cell proliferation through cMyc. *Neoplasia*.  
743 2014;16(11):900-8.
- 744 82. Rao S, Lyons LS, Fahrenholtz CD, Wu F, Farooq A, Balkan W, et al. A novel nuclear  
745 role for the Vav3 nucleotide exchange factor in androgen receptor coactivation in prostate  
746 cancer. *Oncogene*. 2012;31(6):716-27.

- 747 83. Shang Z, Yu J, Sun L, Tian J, Zhu S, Zhang B, et al. LncRNA PCAT1 activates AKT and  
748 NF-kappaB signaling in castration-resistant prostate cancer by regulating the  
749 PHLPP/FKBP51/IKKalpha complex. *Nucleic Acids Res.* 2019;47(8):4211-25.
- 750 84. Williams SA, Xu Y, De Marzo AM, Isaacs JT, Denmeade SR. Prostate-specific antigen  
751 (PSA) is activated by KLK2 in prostate cancer ex vivo models and in prostate-targeted  
752 PSA/KLK2 double transgenic mice. *Prostate.* 2010;70(7):788-96.
- 753 85. Chen EY, Tan CM, Kou Y, Duan Q, Wang Z, Meirelles GV, et al. Enrichr: interactive  
754 and collaborative HTML5 gene list enrichment analysis tool. *BMC Bioinformatics.* 2013;14:128.
- 755 86. Kuleshov MV, Jones MR, Rouillard AD, Fernandez NF, Duan Q, Wang Z, et al. Enrichr:  
756 a comprehensive gene set enrichment analysis web server 2016 update. *Nucleic Acids Res.*  
757 2016;44(W1):W90-7.
- 758 87. Gui B, Gui F, Takai T, Feng C, Bai X, Fazli L, et al. Selective targeting of PARP-2  
759 inhibits androgen receptor signaling and prostate cancer growth through disruption of FOXA1  
760 function. *Proc Natl Acad Sci U S A.* 2019;116(29):14573-82.
- 761 88. Jones D, Wade M, Nakjang S, Chaytor L, Grey J, Robson CN, et al. FOXA1 regulates  
762 androgen receptor variant activity in models of castrate-resistant prostate cancer. *Oncotarget.*  
763 2015;6(30):29782-94.
- 764 89. Andreu-Vieyra C, Lai J, Berman BP, Frenkel B, Jia L, Jones PA, et al. Dynamic  
765 nucleosome-depleted regions at androgen receptor enhancers in the absence of ligand in prostate  
766 cancer cells. *Mol Cell Biol.* 2011;31(23):4648-62.
- 767 90. Chen Z, Lan X, Thomas-Ahner JM, Wu D, Liu X, Ye Z, et al. Agonist and antagonist  
768 switch DNA motifs recognized by human androgen receptor in prostate cancer. *EMBO J.*  
769 2015;34(4):502-16.
- 770 91. Ye Z, Chen Z, Sunkel B, Frietze S, Huang TH, Wang Q, et al. Genome-wide analysis  
771 reveals positional-nucleosome-oriented binding pattern of pioneer factor FOXA1. *Nucleic Acids*  
772 *Res.* 2016;44(16):7540-54.

- 773 92. Strobeck MW, Knudsen KE, Fribourg AF, DeCristofaro MF, Weissman BE, Imbalzano  
774 AN, et al. BRG-1 is required for RB-mediated cell cycle arrest. *Proc Natl Acad Sci U S A*.  
775 2000;97(14):7748-53.
- 776 93. Zhang HS, Gavin M, Dahiya A, Postigo AA, Ma D, Luo RX, et al. Exit from G1 and S  
777 phase of the cell cycle is regulated by repressor complexes containing HDAC-Rb-hSWI/SNF  
778 and Rb-hSWI/SNF. *Cell*. 2000;101(1):79-89.
- 779 94. Naidu SR, Love IM, Imbalzano AN, Grossman SR, Androphy EJ. The SWI/SNF  
780 chromatin remodeling subunit BRG1 is a critical regulator of p53 necessary for proliferation of  
781 malignant cells. *Oncogene*. 2009;28(27):2492-501.
- 782 95. Stelloo S, Nevedomskaya E, Kim Y, Hoekman L, Bleijerveld OB, Mirza T, et al.  
783 Endogenous androgen receptor proteomic profiling reveals genomic subcomplex involved in  
784 prostate tumorigenesis. *Oncogene*. 2018;37(3):313-22.
- 785 96. Pomerantz MM, Li F, Takeda DY, Lenci R, Chonkar A, Chabot M, et al. The androgen  
786 receptor cistrome is extensively reprogrammed in human prostate tumorigenesis. *Nat Genet*.  
787 2015;47(11):1346-51.
- 788 97. Rueden CT, Schindelin J, Hiner MC, DeZonia BE, Walter AE, Arena ET, et al. ImageJ2:  
789 ImageJ for the next generation of scientific image data. *BMC Bioinformatics*. 2017;18(1):529.
- 790 98. Schneider CA, Rasband WS, Eliceiri KW. NIH Image to ImageJ: 25 years of image  
791 analysis. *Nat Methods*. 2012;9(7):671-5.
- 792 99. Liao Y, Smyth GK, Shi W. featureCounts: an efficient general purpose program for  
793 assigning sequence reads to genomic features. *Bioinformatics*. 2014;30(7):923-30.
- 794 100. Bert SA, Robinson MD, Strbenac D, Statham AL, Song JZ, Hulf T, et al. Regional  
795 activation of the cancer genome by long-range epigenetic remodeling. *Cancer cell*. 2013;23(1):9-  
796 22.

797 101. Ramirez F, Ryan DP, Gruning B, Bhardwaj V, Kilpert F, Richter AS, et al. deepTools2: a  
798 next generation web server for deep-sequencing data analysis. *Nucleic Acids Res.*  
799 2016;44(W1):W160-5.

800

## 801 **FIGURE LEGENDS**

802

803 **Figure 1. *SMARCA4* (BRG1) is over expressed in prostate cancer.** A) *SMARCA4* gene  
804 expression (logPRKM) in TCGA data (tumours n= 486, normal = 52) with tumour samples  
805 separated by molecular subtype defined by the TCGA. *SMARCA4* expression is increased across  
806 all groups, with subtypes ERG, ETV1, ETV4, IDH1, SPOP, and FOXA1 all significantly up  
807 regulated, one-way ANOVA Dunnett's multiple comparison correction  $**p < 0.05$ . B) *SMARCA4*  
808 gene expression in prostate cell lines normalised to *18S* and relative to PrEC (n = 2). Significance  
809 determined by one-way ANOVA with Tukey's multiple comparison correction  $***p < 0.001$ . Bars  
810 denote mean, and error bars are SD. C) Representative Western blot of BRG1 protein level in  
811 prostate cell lines. Quantification above Western Blot by adjusted relative density normalized to  
812 GAPDH and relative to PrEC. D) Expression of *SMARCA4* from RNA-seq in prostate cell lines  
813 grouped as normal, cancer or transformed. The mean of each group was calculated, and a  
814 significance was tested by one-way ANOVA Dunnett's multiple comparison correction,  
815  $**p < 0.05$ .

816

817 **Figure 2. Loss of BRG1 results in a down regulation of gene expression.** A) Schematic of  
818 temporal BRG1 knockdown model used for RNA-seq. Samples were collected at 72hrs (si-NT  
819 control, si-*SMARCA4*-1 and si-*SMARCA4*-2) and 144hrs (si-NT, si-*SMARCA4*-1 and si-  
820 *SMARCA4*-2) post siRNA transfection in duplicate for each condition at each time point (n=2).  
821 Cells were transfected with either control siRNA (si-NT) or *SMARCA4* siRNA. B) *SMARCA4*  
822 gene expression in control and post BRG1 depletion in the RNA-seq data, shown as transcripts



823 per million reads (TPM). Control siRNA for 72 and 144 hours are shown collectively as si-NT.  
824 *SMARCA4* expression is significantly down regulated at both time points, \*\*\* $p < 0.0001$ . Bars  
825 denote mean, and error bars are SD. C) Representative Western blots of BRG1 and GAPDH  
826 protein levels at 72 and 144 hours post transfection. Adjusted relative density for BRG1 is  
827 calculated relative to GAPDH and normalized to the non-targeting control. Bars denote mean, and  
828 error bars are SD. D-E) Volcano plots of differentially expressed genes at 72 hours and 144 hours  
829 post knockdown. Significantly down regulated genes are blue and significantly up regulated genes  
830 for 72 and 144 hours post knockdown are shown in orange and red respectively. *SMARCA4*  
831 differential expression is highlighted in purple. Expression is shown as normalised log<sub>2</sub> counts per  
832 million reads.

833  
834 **Figure 3. BRG1 regulates genes associated with prostate cancer.** A) Heatmap illustrating  
835 RNA-seq differential gene expression data for up (n = 16) and down (n = 126) regulated genes  
836 common to both time points after BRG1 depletion. Expression is represented as the normalised  
837 row Z-score of TPM. B-D) *KLK2*, *VAV3* and *PCAT-1* gene expression from the RNA-seq datasets  
838 shown as TPM. Bars denote mean, and error bars are SD. E) Gene set enrichment analysis using  
839 ‘Enrichr’ of differentially expressed genes that are common to both time points, showing the  
840 adjusted p-value (log<sub>10</sub>, reversed x-axis) of significantly enriched transcription factor ChIP-seq  
841 from ChEA curated data ( $p < 0.05$ ). F) Heatmap of BRG1, AR and FOXA1 ChIP-seq signal at  
842 BRG1 binding sites in LNCaP cells, +/- 2.5 kb from the centre of the binding site. Data is clustered  
843 into three groups by k-means. G) IGV images of the genes *KLK2*, *PCAT-1* and *VAV3*. Grey shaded  
844 regions contain ChIP-seq signal peaks for BRG1, AR and FOXA1.

845  
846 **Figure 4. BRG1 regulates genes involved the cell cycle.** A) Gene set enrichment analysis using  
847 ‘Enrichr’ of down regulated genes at 144 hours post BRG1 knockdown. Enriched GO terms are  
848 classified as biological processes, cellular component or molecular function. Adjusted p-value (log

849 10, reversed x-axis) of the 10 most significant GO terms are shown. B) Heatmap of gene  
850 expression profiles from the top 40 differential cell cycle genes after BRG1 depletion. Expression  
851 is shown as the normalised row Z-score of transcripts per million reads (TPM), with blue indicating  
852 higher expression and red indicating lower expression. Genes involved in DNA replication  
853 initiation are indicated in blue. C-D) Gene expression from RNA-seq (TPM), of the MCM2-7  
854 helicase components (top) and the Origin of Replication complex (ORC) subunits (bottom). Error  
855 bars denote mean and standard deviation. Bars denote mean, and error bars are SD. E)  
856 Representative Western blot showing protein levels of replication initiation genes MCM5, CDC6  
857 and ORC6, along with CHK1, after 72 and 144 hours post BRG1 depletion. Error bars demonstrate  
858 SD. F) Quantification of Western blots demonstrating adjusted relative density to GAPDH (n =  
859 2). G) Representative flow cytometry scatter of DAPI (x-axis) and EdU (y-axis) fluorescence  
860 intensity at 72 and 144 hours post BRG1 knockdown. G1 cells are shown by boxed gate. H)  
861 Percentage of cells in each phase of the cell cycle from flow cytometry data, error bars show  
862 standard deviation (n = 2). Error bars show SD.

863  
864 **Supplementary Figure 1.** A) SWI/SNF subunit gene expression (TPM) from RNA-seq data. All  
865 subunits, except *SMARCA4* (shown in Figure 2A), are not significantly altered. Bars denote mean,  
866 and error bars are SD. B) PCA plot characterising the trend in expression profiles between the  
867 non-targeting control and after BRG1 knockdown. Each point on the plot represents an RNA-seq  
868 sample. Samples are separated by principal components 1 and 2, which together explain 58.37 %  
869 of the variance between the samples. C) Number of skipped exons at 72 hours and 144 hours after  
870 BRG1 knockdown with si-*SMARCA4*-1 (black) and si-*SMARCA4*-2 (grey). D) Number of retained  
871 introns at 72 hours and 144 hours post BRG1 depletion with si-*SMARCA4*-1 (black) and si-  
872 *SMARCA4*-2 (grey). E) Sashimi plot of exons one and two of the *KLK3* gene in the non-targeting  
873 and 144 hour knockdown RNA-seq data. Arcs represent the number of split reads across the exons.  
874 Lower numbers represent increased retention of the first intron after BRG1 knockdown.

875

876 **Supplementary Figure 2.** A) Expression of *KLK2*, *PCAT-1* and *VAV3* in prostate cell lines  
877 grouped as normal, cancer or transformed. B) *AR* and *FOXA1* gene expression from the RNA-seq  
878 datasets shown as TPM. Bars denote mean, and error bars are SD.

879

880 **Supplementary Figure 3.** A) Heatmap of replication gene promoters, +/- 5kb from the  
881 transcription start site. B) IGV images of the genes *CDC45*, *ORC6* and *MCM2*. Grey shaded  
882 regions contain ChIP-seq signal peaks for BRG1 and active histone modifications.

**FIGURE 1**

**A**

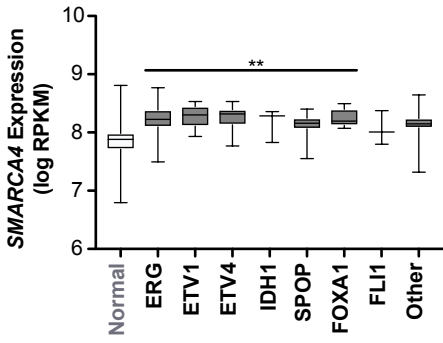

**B**

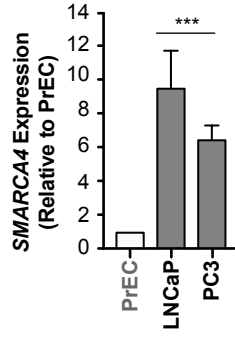

**C**

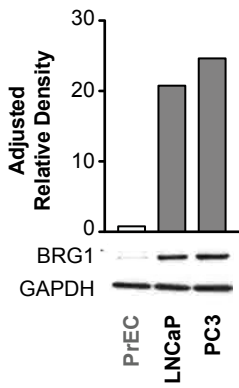

**D**

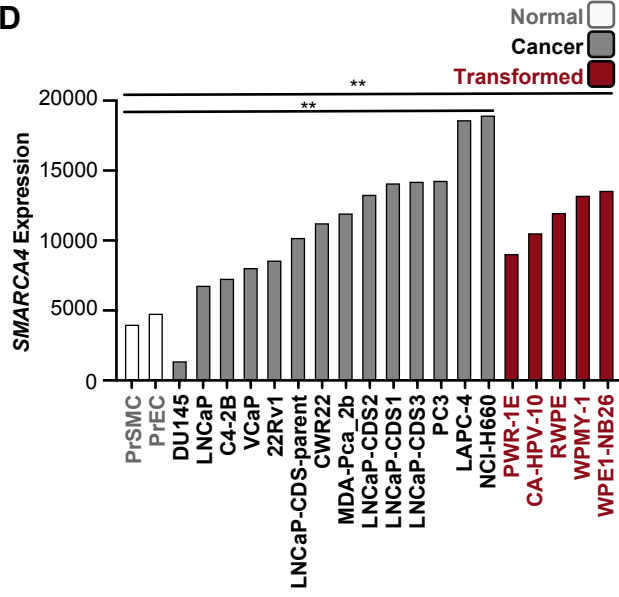

FIGURE 2

A

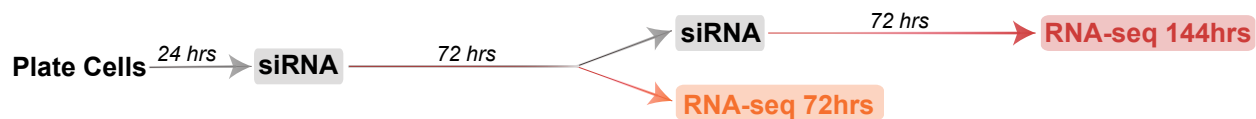

B

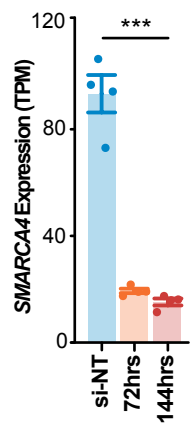

C

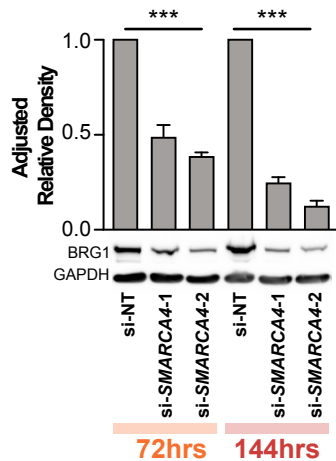

D

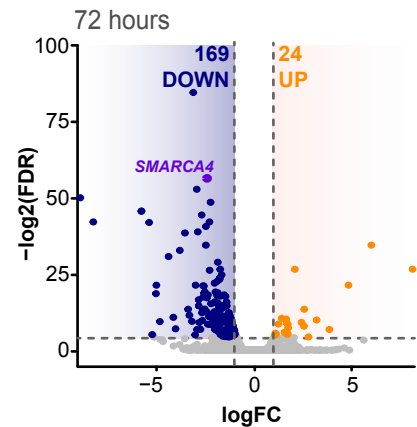

E

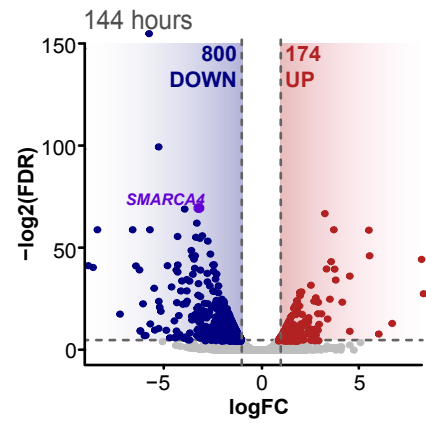

**FIGURE 3**

**A**

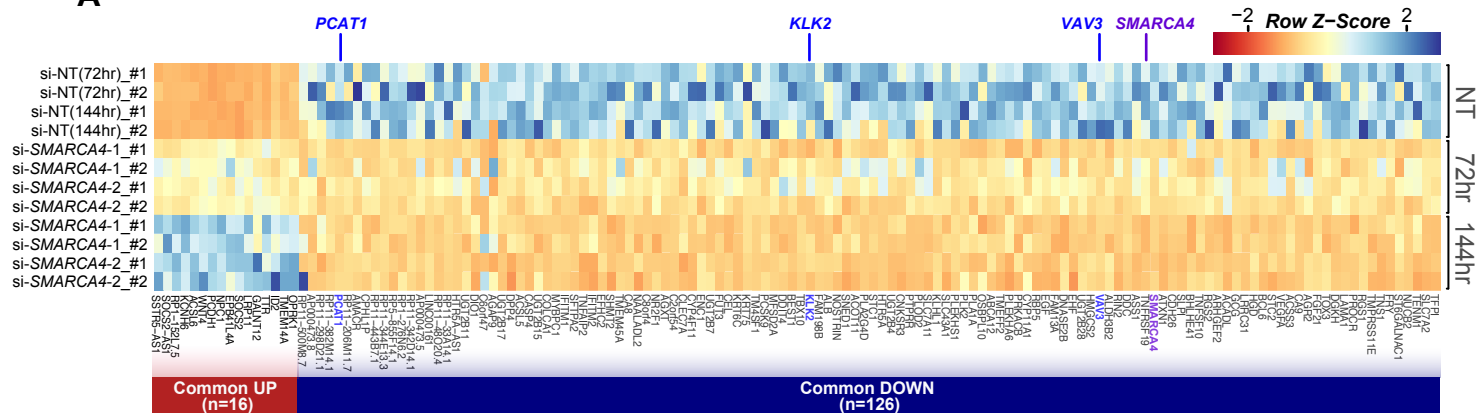

**B**

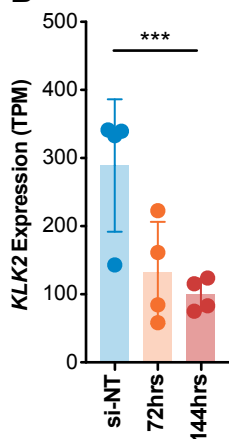

**C**

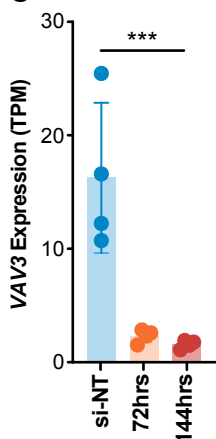

**D**

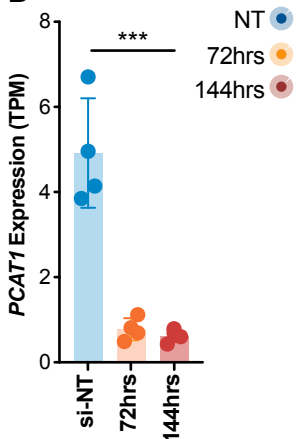

**E**

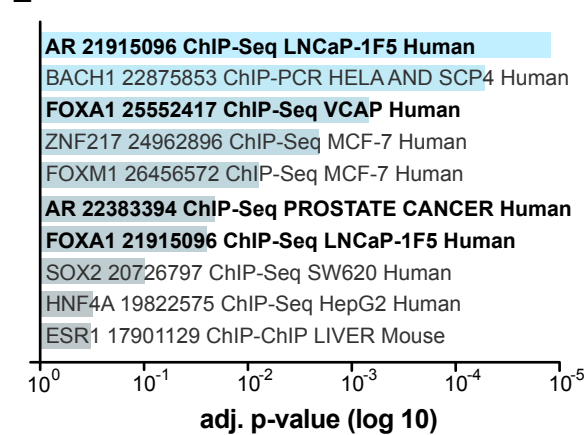

**F**

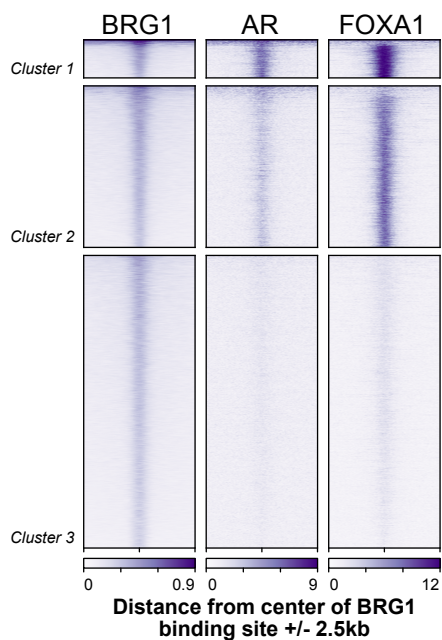

**G**

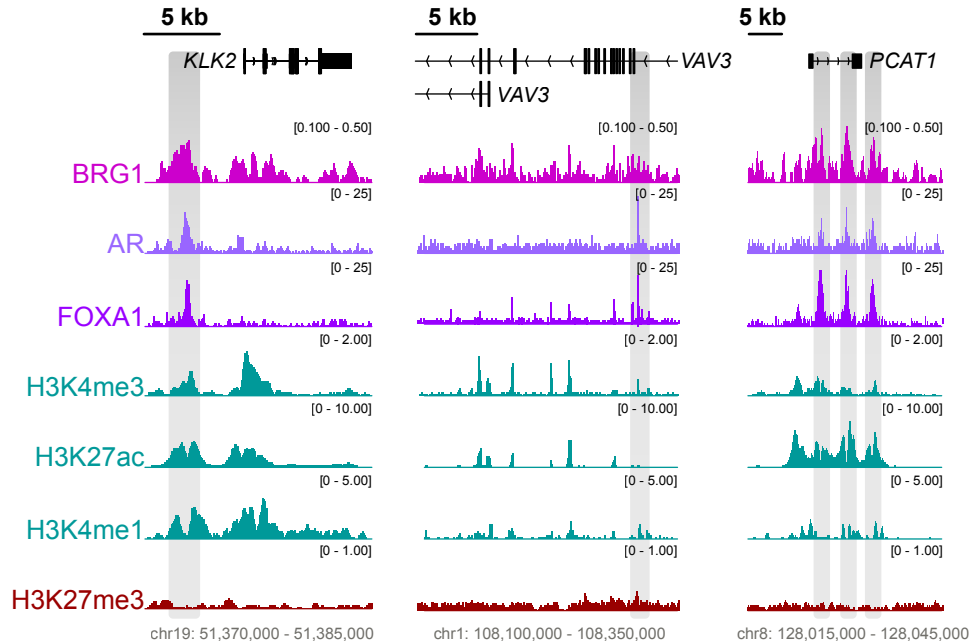

**FIGURE 4**

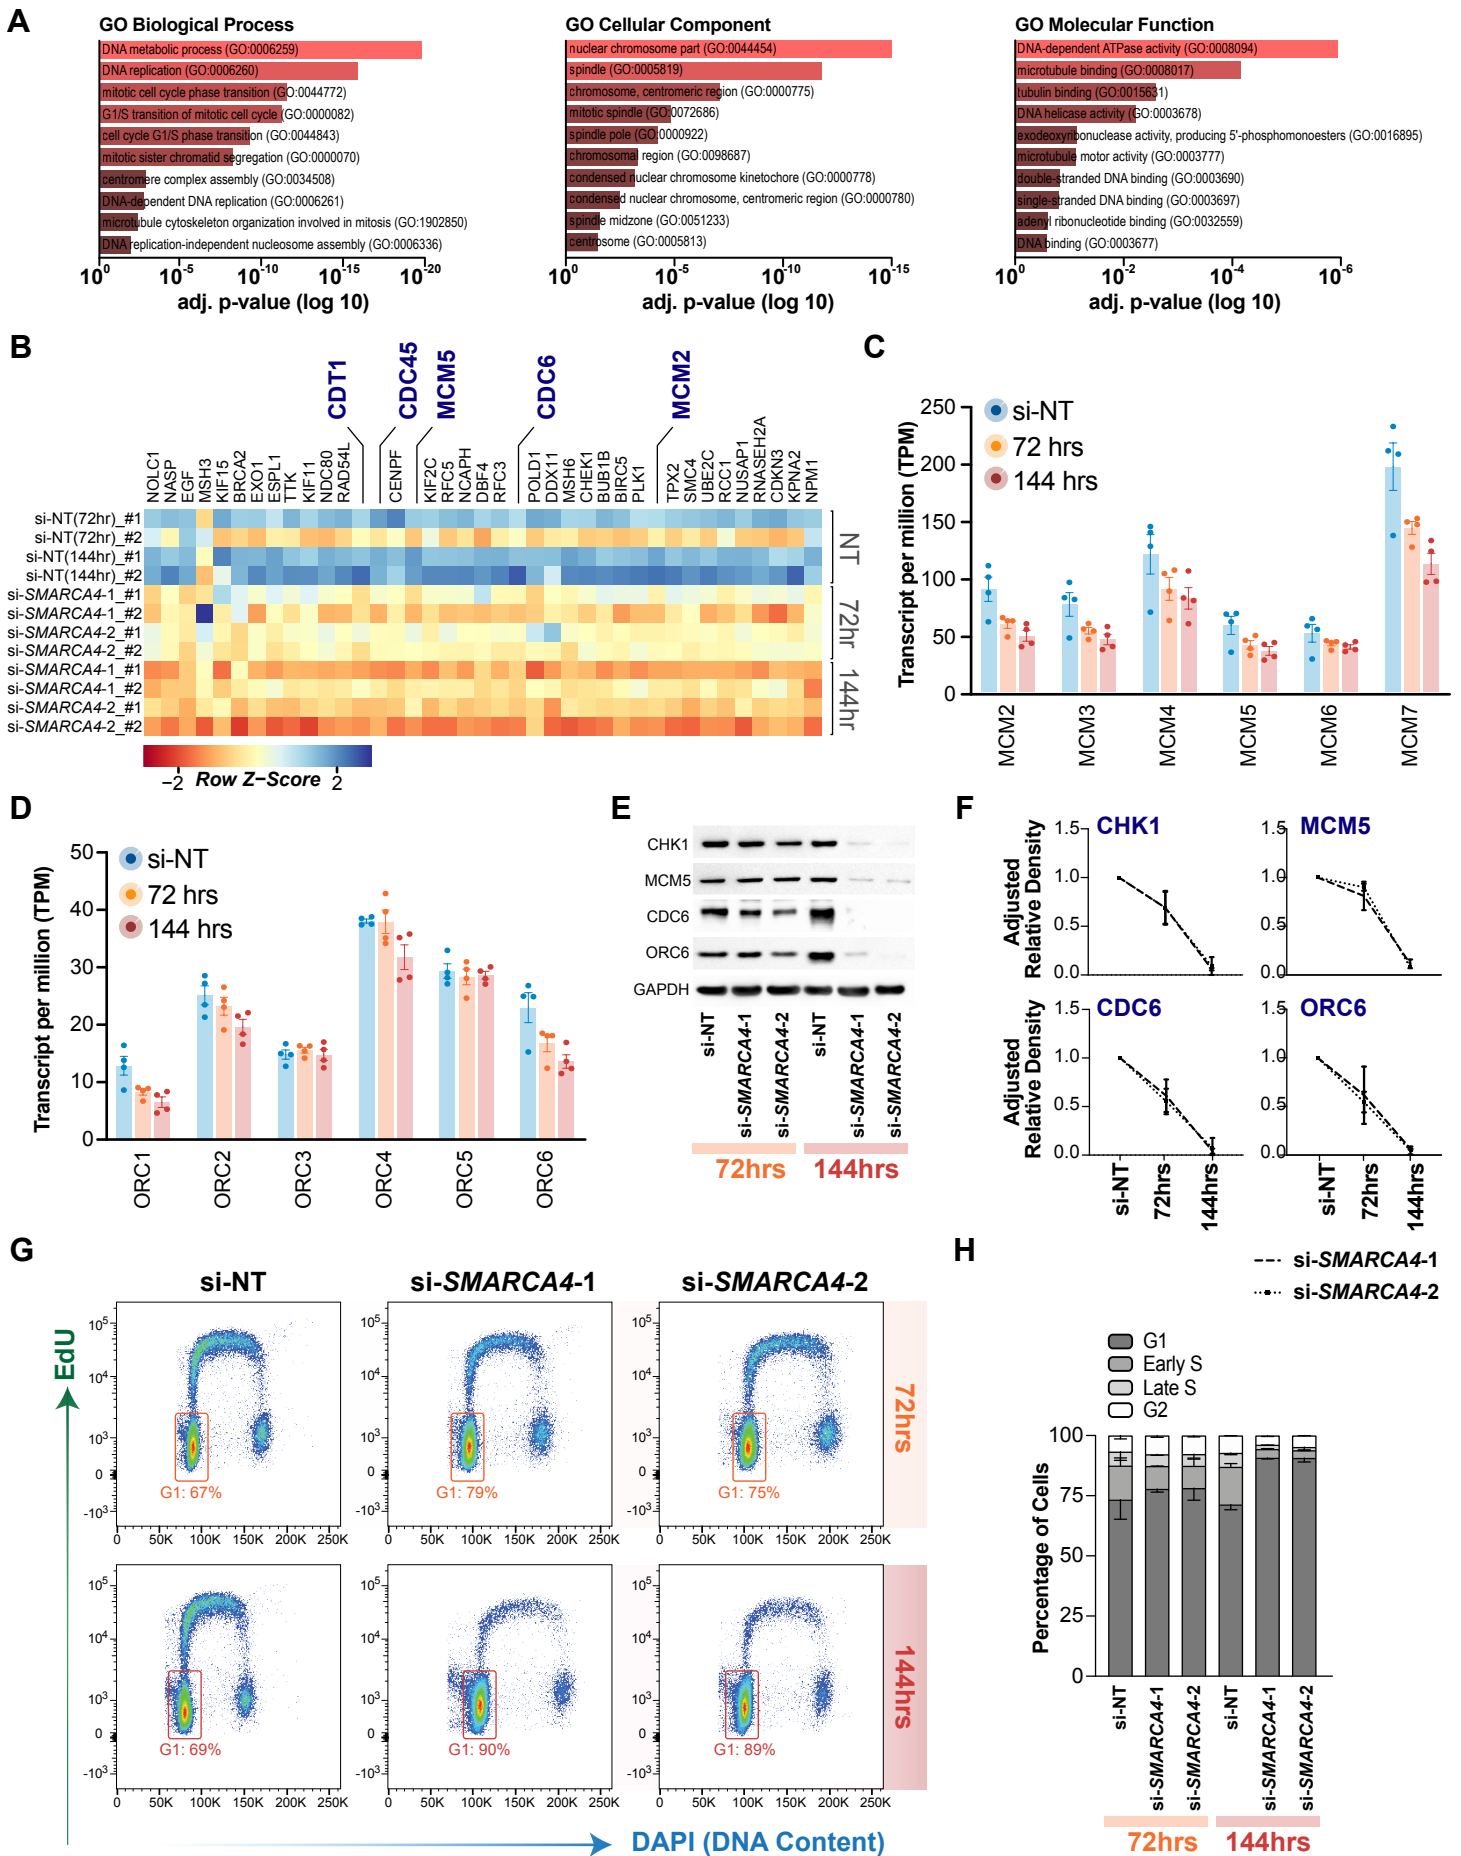

Source: https://www.biorxiv.org/content/10.1101/2020.07.03.187385v2.full.pdf
